# Supplementary material
Source: Springer Nature journal article supplement (https://www.springermedizin.de/resource/supplementary/12873_2013_193_MOESM1_ESM.pdf/9431598)

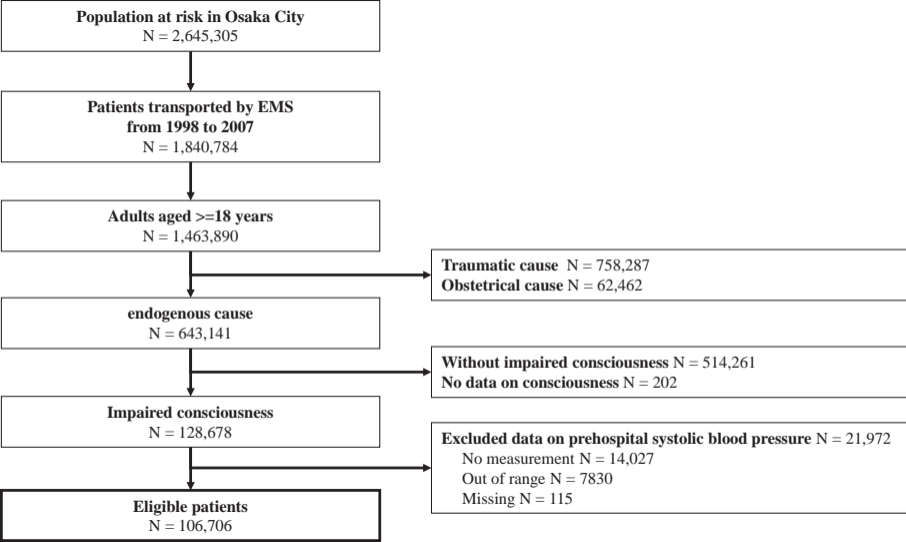

Supplement: MOESM1 [file 9431598]
